# Supplementary material
Source: PubMed Central journal article supplement (PMC4344459)
Supplement: 13_069_Colombo.Suppl.pdf [file 13_069_Colombo.Suppl.pdf]

Supplemental Data

Expression of Immunoglobulin Receptors with Distinctive Features Indicating Antigen Selection by Marginal Zone B Cells from Human Spleen

Monica Colombo,<sup>1</sup> Giovanna Cutrona,<sup>2</sup> Daniele Reverberi,<sup>3</sup> Silvia Bruno,<sup>4</sup> Fabio Ghiotto,<sup>4</sup> Claudya Tenca,<sup>4</sup> Kostas Stamatopoulos,<sup>5,6</sup> Anastasia Hadzidimitriou,<sup>5</sup> Jenny Ceccarelli,<sup>1</sup> Sandra Salvi,<sup>3</sup> Simona Boccardo,<sup>3</sup> Maria Grazia Calevo,<sup>7</sup> Amleto De Santanna,<sup>4</sup> Mauro Truini,<sup>3</sup> Franco Fais,<sup>4</sup> and Manlio Ferrarini<sup>1</sup>

Online address: <http://www.molmed.org>

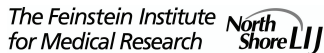

SUPPLEMENTARY RESULTS

Search for Sequences Related to Those of the MZ B Cells in FM and GC B Cells

In order to search for sequences related to one of the MZ B cell clonal families in other B cell subsets, we used a qRT-PCR with VH CDR3 clone-specific oligos (Supplementary Figure S2). There was no amplification for these specific VH CDR3 rearrangements in FM, GC B cells or in placental tissue (used as control), while amplification was specifically observed in MZ B cells (Supplementary Figure S2), possibly indicating that the clones investigated were present only in MZ B cells.

When sequenced, all the molecular clones from FM and GC B cells were found to contain *IGHV1-69* genes, proving the specificity of the methodology. The clones were either unique or recurrent according to the definition provided above. When we looked for sequences related to those found expanded in the MZ, 2 groups only of such clones were found in the GC, but not in the FM B cells from spleen 1, whereas only 1 and 2 groups of MZ-related sequences were detected in the FM and GC B cells respectively from spleen 4 (Supplementary Table S2). These sequences shared some (but not all) of the mutations of the clones from MZ B cells

(in Supplementary Figure S3 is shown one of these groups) and the pattern of mutations was consistent with less diversification in GC- than in MZ-derived

clones. However, because of the mutation pattern and the paucity of clones detected no progenitor/effector relationship could be established.

Supplementary Table S1. IGHV gene features of MZ, GC and FM B cells.

| B cells subsets | N. Seq. | Average n. mutations (Min-Max) | IGHV gene diversity (%) | Mean transitions (Min-Max) | Mean transversions (Min-Max) |
|-----------------|---------|--------------------------------|-------------------------|----------------------------|------------------------------|
| All sequences   |         |                                |                         |                            |                              |
| MZ              | 469     | 11.76 (0-48)                   | 4.0                     | 6.71 (0-26)                | 5.05 (0-22)                  |
| FM              | 419     | 3.58 (0-30)                    | 1.2                     | 2.01 (0-19)                | 1.57 (0-18)                  |
| GC              | 300     | 10.23 (0-35)                   | 3.7                     | 5.97 (0-24)                | 4.26 (0-16)                  |
| Mutated only    |         |                                |                         |                            |                              |
| MZ              | 361     | 14.80                          | 5.06                    | 8.43 (1-26)                | 6.36 (0-22)                  |
| FM              | 123     | 10.61                          | 3.62                    | 5.8 (1-19)                 | 4.8 (0-18)                   |
| GC              | 225     | 13.44                          | 4.86                    | 7.81 (0-24)                | 5.64 (0-18)                  |

Supplementary Table S2. Summary of the results obtained following IGHV1-69 gene-specific nested PCR.

| Spleen | B cell subset | IGHV gene | Sequences analyzed | Unique rearrangements (% TOT) | Recurrent rearrangements | Groups of shared clones <sup>a</sup> | N. of sequences <sup>b</sup> |
|--------|---------------|-----------|--------------------|-------------------------------|--------------------------|--------------------------------------|------------------------------|
| 1      | FM            | 1-69      | 29                 | 29/29 (100%)                  | 0                        |                                      |                              |
| 1      | GC            | 1-69      | 59                 | 26/59 (44%)                   | 33                       | 2                                    | 3                            |
|        |               |           |                    |                               |                          |                                      | 9                            |
| 4      | FM            | 1-69      | 46                 | 23/46 (50%)                   | 23                       | 1                                    | 2                            |
| 4      | GC            | 1-69      | 51                 | 8/51 (15.6%)                  | 43                       | 2                                    | 5                            |
|        |               |           |                    |                               |                          |                                      | 8                            |

<sup>a</sup> Indicate the number of clonal families that are related to the clones found in the MZ B cells.

<sup>b</sup> Indicate the number of sequences included in each group of clones related to MZ.

MZ B CELLS IN HUMAN SPLEEN

|                       | FR1-IMGT<br>(1-26)        | CDR1-IMGT<br>(27-38) | FR2-IMGT<br>(39-55) | CDR2-IMGT<br>(56-65) | FR3-IMGT<br>(66-104)                   | CDR3-IMGT                 |                                          |                                          |
|-----------------------|---------------------------|----------------------|---------------------|----------------------|----------------------------------------|---------------------------|------------------------------------------|------------------------------------------|
| Homosap IGHV1-69*01 F | QVQLVQSGA.EVKKPGSSVKVCKAS | GGTF...SSYA          | ISWVRQAPQGLEWMGG    | IIPF.PGTA            | NYAQKFO.GRVTTADESTSTAYMELSSLRSEDATVYYC | AR                        |                                          |                                          |
| SPL1MZVH1CL-072       | -----                     | ...-N-               | -N                  | ...-K-               | -----                                  | --GFGDSSGYPDPYNY          | WGQGLTVTVSS Homosap IGHJ4*01             |                                          |
| SPL1MZVH1CL-066       | -----                     | ...-RF-              | -N                  | ...-S                | -----                                  | N-V---R---D-S-I           | WGQGLTVTVSS Homosap IGHJ4*01             |                                          |
| SPL1MZVH1CL-115       | -----                     | ...-NK-              | MT                  | ...-S                | -----                                  | N-V---M---D-S-T           | WGQGLTVTVSS Homosap IGHJ4*01 or IGHJ1*01 |                                          |
| SPL1MZVH1CL-050       | -----                     | ...-N-               | -N                  | ...-S                | -----                                  | V---R---T---L             | WGQGLTVTVSS Homosap IGHJ4*01 or IGHJ1*01 |                                          |
| SPL1MZVH1CL-037       | -----                     | ...-N-               | -N                  | ...-V                | -----                                  | K---K---T---A             | WGQGLTVTVSS Homosap IGHJ4*01             |                                          |
| SPL1MZVH1CL-065       | -----                     | ...-N-               | -N                  | ...-K                | -----                                  | K---K---T---A             | WGQGLTVTVSS Homosap IGHJ4*01             |                                          |
| SPL1MZVH1CL-103       | -----                     | ...-N-               | -N                  | ...-T                | -----                                  | H---I---R---T---D---R---D | T---RS-A                                 | WGQGLTVTVSS Homosap IGHJ4*01 or IGHJ1*01 |
| SPL1MZVH1CL-076       | -----                     | ...-RN-              | -N                  | ...-S                | -----                                  | L---R---T---VR            | ---THA---Y                               | WGQGLTVTVSS Homosap IGHJ4*01 or IGHJ1*01 |
| SPL1MZVH1CL-113       | -----                     | ...-N-               | -N                  | ...-V                | -----                                  | L---R---T---VR            | ---TTHA---Y                              | WGQGLTVTVSS Homosap IGHJ4*01 or IGHJ1*01 |
| SPL1MZVH1CL-070       | -----                     | ...-K-               | -N                  | ...-M                | -----                                  | A---R---VS---G            | ---E-TA-VY                               | WGQGLTVTVSS Homosap IGHJ4*01             |
| SPL1MZVH1CL-112       | -----                     | ...-N-               | -N                  | ...-S                | -----                                  | K                         | ---E                                     | WGQGLTVTVSS Homosap IGHJ4*01             |
| SPL1MZVH1CL-006       | -----                     | ...-R-               | -N                  | ...-S                | -----                                  | A                         | ---E                                     | WGQGLTVTVSS Homosap IGHJ4*01             |
| SPL1MZVH1CL-016       | -----                     | ...-R-               | -N                  | ...-Q                | -----                                  | N-K                       | ---N-V                                   | WGQGLTVTVSS Homosap IGHJ4*01             |
| SPL1MZVH1CL-108       | -----                     | ...-NN-              | -N                  | ...-P                | -----                                  | V---ER---I---D---R---F    | T---NT-S                                 | WGQGLTVTVSS Homosap IGHJ4*01             |
| SPL1MZVH1CL-109       | -----                     | ...-NN-              | -N                  | ...-P                | -----                                  | V---ER---I---D---R---F    | T---NT-S                                 | WGQGLTVTVSS Homosap IGHJ4*01             |
| SPL1MZVH1CL-018       | -----                     | ...-K-               | -N                  | ...-V                | -----                                  | I---R---I---R---T---D---I | T---NS-A                                 | WGQGLTVTVSS Homosap IGHJ4*01 or IGHJ5*01 |

**Supplementary Figure S1.** Intraclonal diversification in MZ B Cells. An example of related sequences isolated from MZ B cells of spleen 1 is reported. Amino acids sequences of related clones are aligned with the closest germ line gene sequence (*IGHV1-69*). In certain cases, IMGT software indicates two possible IGHJ germ line genes. The first has the highest identity. The presence of shared and unique mutations in the different clones is indicative of intraclonal diversification.

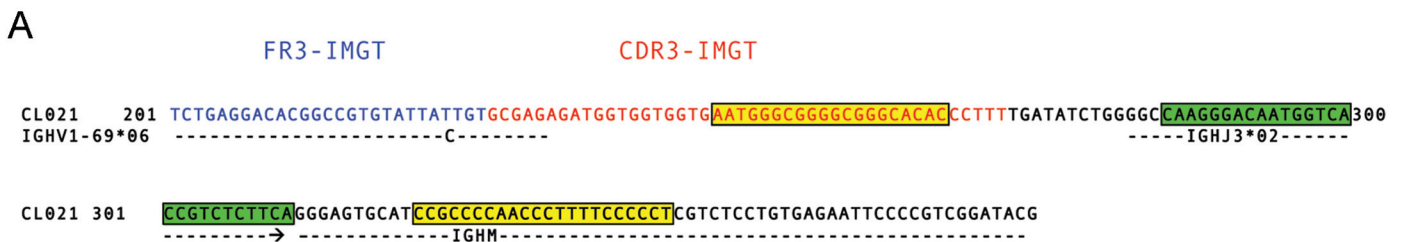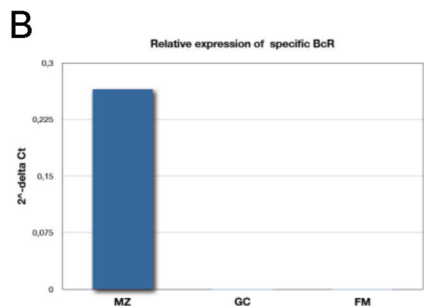

**Supplementary Figure S2.** Clone specific qRT-PCR. (A) Partial nucleotide sequence of a marginal zone clonal family member that uses IGHV1-69\*04/IGHD2-21\*01/IGHJ3\*02 rearrangement is shown. Forward specific primer (yellow) was designed based on sequence of VH CDR3 and used in conjunction with primer specific for IGHM gene (yellow). Hybridization probe selectively bind the IGHJ3 gene (green). (B) Relative expression of specific VH CDR3 rearrangement was calculated by normalization with POL2 housekeeping gene. No amplification was obtained in the FM and GC B cell subsets while amplification was specifically observed in MZ B cells, possibly indicating that the clones investigated were present only in MZ B cells. Relative expression is calculated as 2<sup>-delta Ct</sup>.
